# Supplementary material
Source: Springer Nature journal article supplement (https://www.springermedizin.de/resource/supplementary/12965_2011_94_MOESM10_ESM.pdf/9573092)
Supplement: MOESM10 [file 9573092]

| Assay   | Primer/Probe   | Sequence (5'→ 3')          | Nucleotide positions |
|---------|----------------|----------------------------|----------------------|
| qRT-PCR | Forward Primer | TACGGCGTGCAGTGCTTCT        | 196-214              |
|         | Reverse Primer | AGATGGTGCGCTCCTGGAT        | 277-295              |
|         | TaqMan Probe   | CTACCCCGATCACATGAAGCAGCACG | 219-244              |
| Cloning | Forward Primer | AAGTTCATCTGCACCAC          | 133-149              |
|         | Reverse Primer | TGTAGTTGCCGTCATCCT         | 302-319              |
